# Supplementary material for: Self-structure formation in polyadenylic acid by small molecules: new insights from the binding of planar dyes thionine and toluidine blue O
Source: Royal Society of Chemistry journal article supplement (doi:10.1039/c4ra02671c), 2014-01-01
Supplement: c4ra02671c1.pdf [file c4ra02671c1.pdf]

## Investigations on self-structure formation in polyadenylic acid by planar dyes: Comparative spectroscopic and calorimetric studies of thionine and toluidine blue O

Puja Paul and Gopinatha Suresh Kumar\*

*Biophysical Chemistry Laboratory, Chemistry Division*

*CSIR-Indian Institute of Chemical Biology*

*Kolkata 700 032, India*

### Supplementary Data

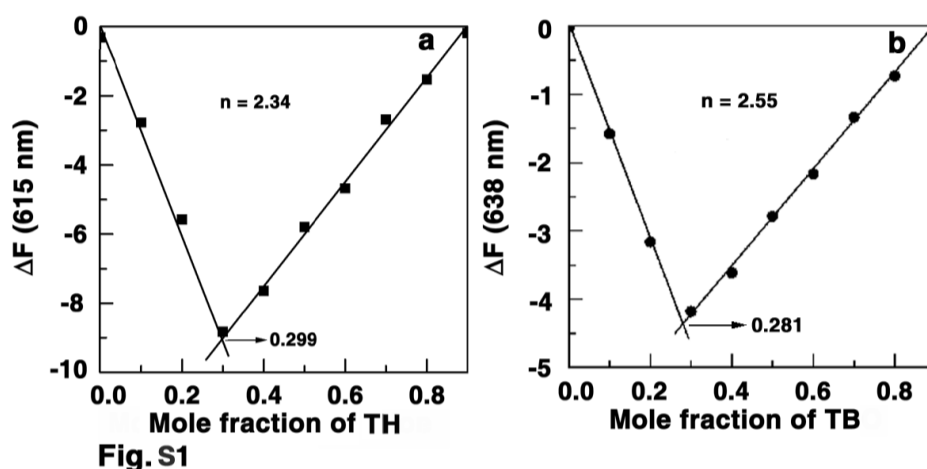

Fig. S1. Job plot for the binding of (a) TH (■) and (b) TB (●) to ss poly(A).

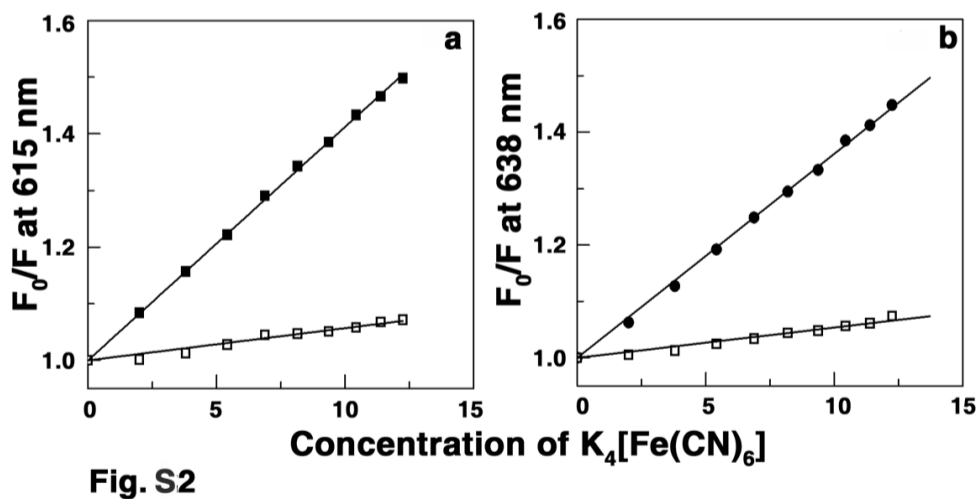

Fig. S2. Stern-Volmer plots for the quenching of (a) TH (■) and (b) TB (●) and complexes of TH- ss poly(A) (□) and TB- ss poly(A) (○) with increasing concentration of  $K_4[Fe(CN)_6]$ .

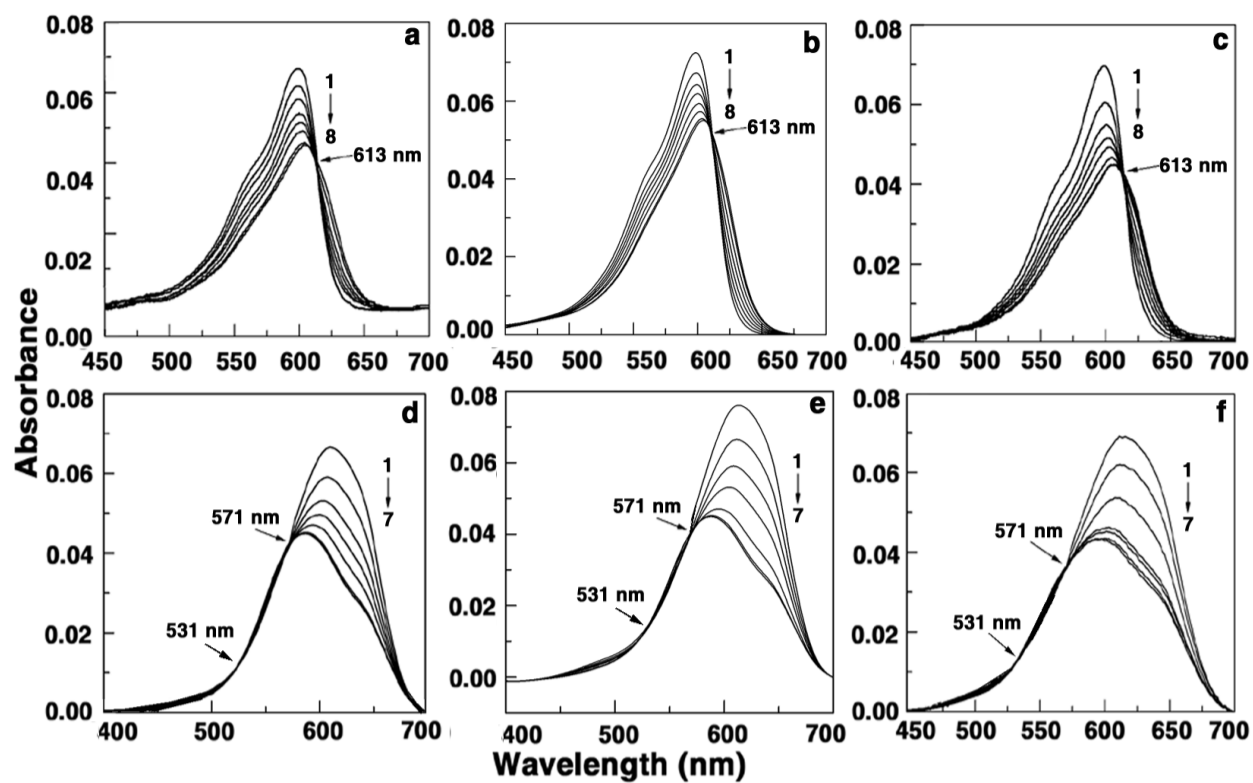

**Fig. S3**

Fig. S3. Absorbance titration of TH (upper panels) and TB (lower panels) in (a,d) 50 mM, (b,e) 100 mM and (c,f) 200 mM  $[\text{Na}^+]$  concentrations.

Table S1: Summary of the optical properties of free and ss poly (A) bound dyes<sup>a</sup>.

| Parameter                                            | TH           | TB           |
|------------------------------------------------------|--------------|--------------|
| Absorbance                                           |              |              |
| $\lambda_{\max}$ (free)                              | 598          | 618          |
| $\lambda_{\max}$ (bound)                             | 606          | 587          |
| $\lambda_{\text{iso}}$ <sup>b</sup>                  | 613          | 531, 571     |
| $\epsilon_f$ (at $\lambda_{\max}$ )                  | 54,200       | 29,200       |
| $\epsilon_b$ (at $\lambda_{\max}$ )                  | 40,390 (598) | 14,270 (618) |
| $\epsilon_{\text{iso}}$ (at $\lambda_{\text{iso}}$ ) | 39,428 (613) | 14,123 (571) |
| Fluorescence                                         |              |              |
| $\lambda_{\max}$ (excitation)                        | 596          | 620          |
| $\lambda_{\max}$ (emission)                          | 615          | 638          |

<sup>a</sup>Units:  $\lambda$  (wavelength) nm;  $\epsilon$  (molar extinction coefficient)  $\text{M}^{-1} \text{cm}^{-1}$ . <sup>b</sup>Wavelengths at the isosbestic points.

Table S2: Binding parameters for the complexation of the two dyes with ss poly(A) evaluated from Scatchard analysis of the absorbance titration data<sup>a</sup>.

| Dyes studied | Salt | $K \times 10^{-5} \text{ (M}^{-1}\text{)}^b$ | n    | $\omega$ | $K \times 10^{-6} \text{ (M}^{-1}\text{)}^b$ |
|--------------|------|----------------------------------------------|------|----------|----------------------------------------------|
| TH           | 50   | 2.66±0.02                                    | 2.23 | 20       | 5.32±0.02                                    |
|              | 100  | 3.21±0.04                                    | 2.21 | 25       | 8.02±0.04                                    |
|              | 200  | 3.11±0.03                                    | 2.19 | 29       | 9.02±0.03                                    |
| TB           | 50   | 0.67±0.03                                    | 2.58 | 60       | 4.02±0.03                                    |
|              | 100  | 0.99±0.01                                    | 2.51 | 71       | 7.03±0.01                                    |
|              | 200  | 1.11±0.02                                    | 2.44 | 75       | 8.33±0.02                                    |

<sup>a</sup>Average of four determinations. <sup>b</sup>Binding constants ( $K$ ) and the number of binding sites (n) conducted in sodium cacodylate buffer of (50, 100 and 200) mM  $[\text{Na}^+]$ , pH 7.2.  $\omega$  is the cooperativity factor.
